# Supplementary material for: Expression of ERBB Family Members as Predictive Markers of Prostate Cancer Progression and Mortality
Source: MDPI journal article supplement (doi:10.3390/cancers13071688), 2021-04-02
Supplement: s1 [file s1]

## Supplementary Materials:

### Expression of ERBB family members as predictive markers of prostate cancer progression and mortality

Sylvie Clairefond, Véronique Ouellet, Benjamin Péant, Véronique Barrès, Pierre I. Karakiewicz, Anne-Marie Mes-Mas-son and Fred Saad

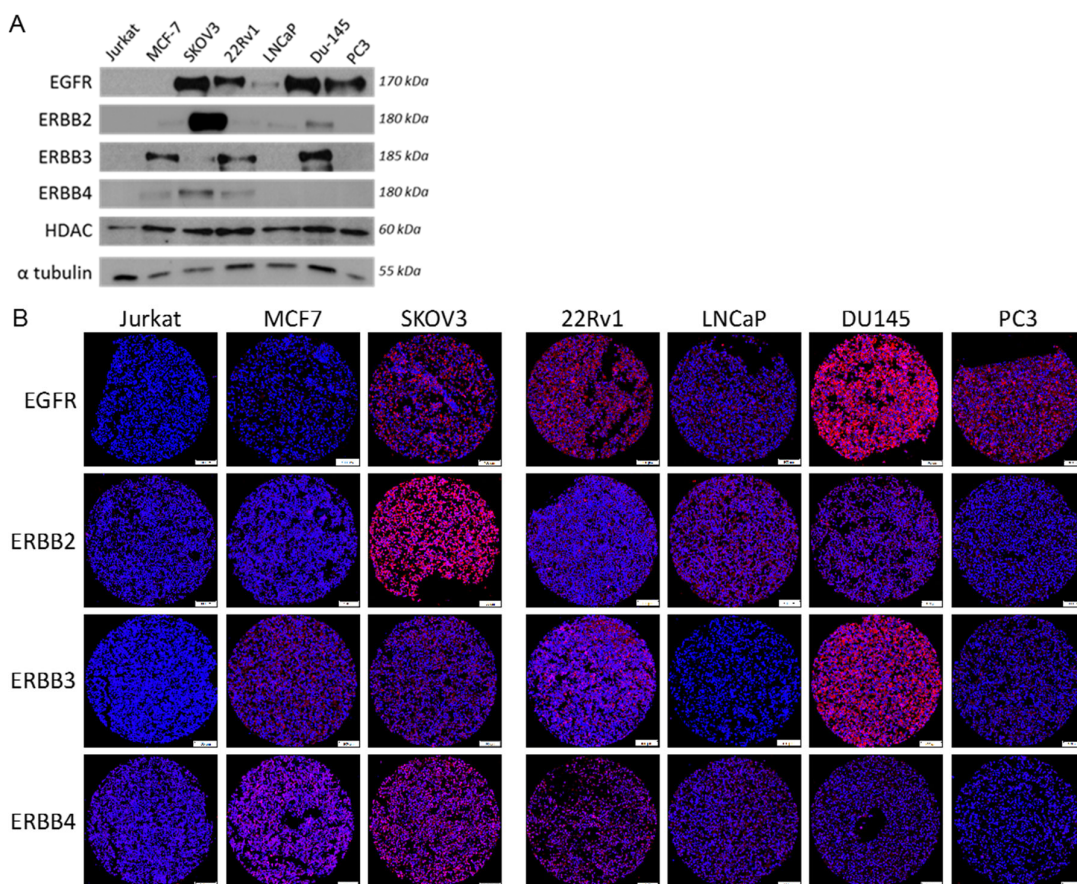

**Figure S1.** Evaluation of antibody specificity for all ERBB family members. (A) Expression of EGFR, ERBB2, ERBB3, and ERBB4 evaluated by western blot in different cell lines.  $\alpha$ -tubulin or HDAC served as a loading control for Western blots. (B) Representative staining for each protein in different paraffin-embedded cell lines. DAPI (blue) and protein of interest (red). The scale bar at 100  $\mu$ m is for the whole image.

A

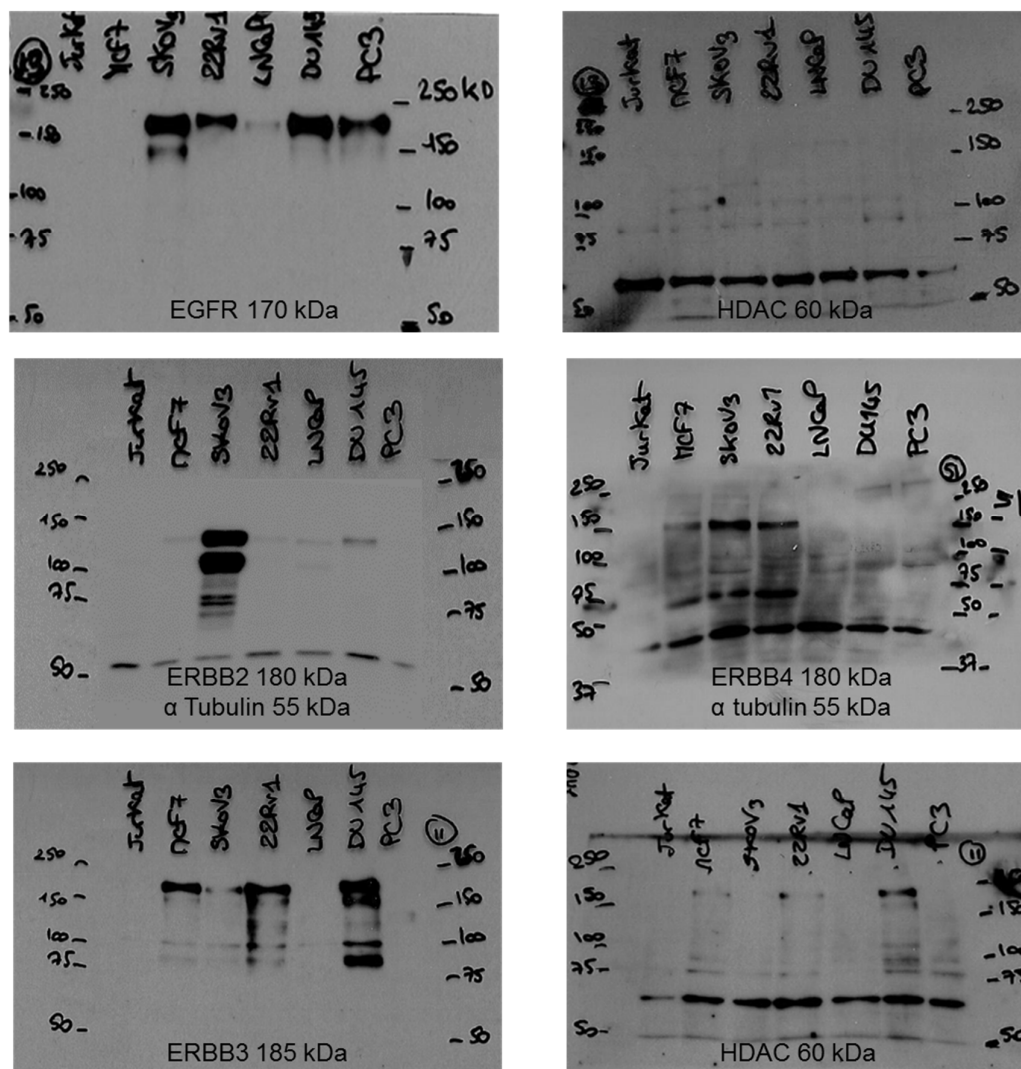

B

|       | Jurkat | MCF-7 | SKOV3 | 22Rv1 | LNCaP | DU145 | PC3  |
|-------|--------|-------|-------|-------|-------|-------|------|
| EGFR  | 0.34   | 0.27  | 1.63  | 0.83  | 0.61  | 1.79  | 1.40 |
| ERBB2 | 0.41   | 0.95  | 1.67  | 0.78  | 0.62  | 0.88  | 0.15 |
| ERBB3 | 0.32   | 0.94  | 0.83  | 1.24  | 0.54  | 1.50  | 0.36 |
| ERBB4 | 0.27   | 0.72  | 0.82  | 0.80  | 0.35  | 0.43  | 0.38 |

**Figure S2.** Whole Western blots of ERBB expression in PC cell lines. (A) Detection of EGFR, ERBB2, ERBB3 and ERBB4 in whole cell lysates in PC cell lines, with  $\alpha$ -Tubulin or HDAC as a control. (B) Intensity ratio of biomarkers for each cell line, normalized with  $\alpha$ -Tubulin or HDAC.
